# Supplementary material for: The Impact of Population Demography and Selection on the Genetic Architecture of Complex Traits
Source: PubMed Central journal article supplement (PMC4038606; doi:10.1371/journal.pgen.1004379), 2014-05-29

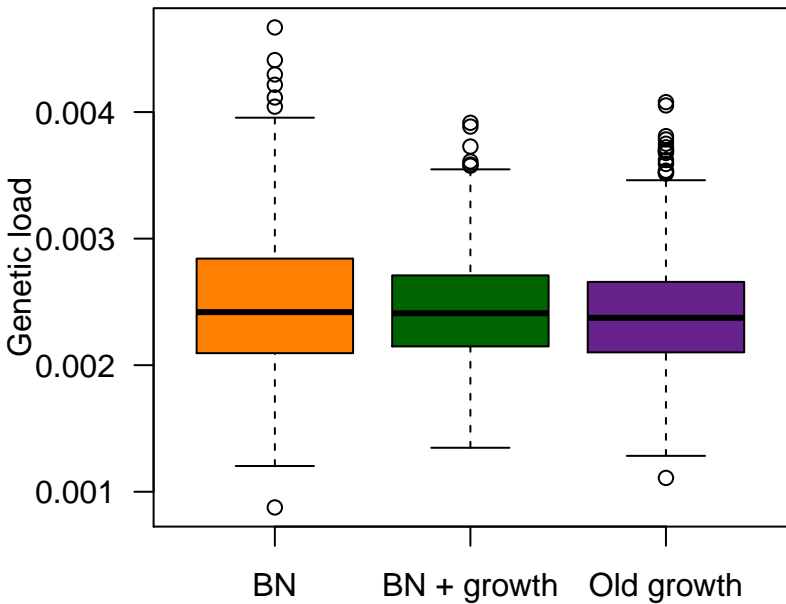

Supplement: pgen.1004379.s003.pdf [file pgen.1004379.s003.pdf]
